# Supplementary material for: Comparison of the Rat and Human Dorsal Root Ganglion Proteome
Source: PubMed Central journal article supplement (PMC6128859; doi:10.1038/s41598-018-31189-9), 2018-09-07
Supplement: 41598_2018_31189_MOESM1_ESM.pdf [file 41598_2018_31189_MOESM1_ESM.pdf]

## **Comparison of the Rat and Human Dorsal Root Ganglion Proteome**

Adam G. Schwaid<sup>1\*</sup>, Alicja Krasowka-Zoladek<sup>2</sup>, An Chi<sup>1</sup>, Ivan Cornella-Taracido<sup>1,3</sup>

1. MRL, Merck & Co., Inc., Boston, MA 02115 USA
2. MRL, Merck & Co., Inc., West Point, PA 19846 USA
3. Current Affiliation: Cedilla Therapeutics, Cambridge, MA 02139

### **Supplementary Figure**

### Correlation of Rat Protein Rank and mRNA Rank

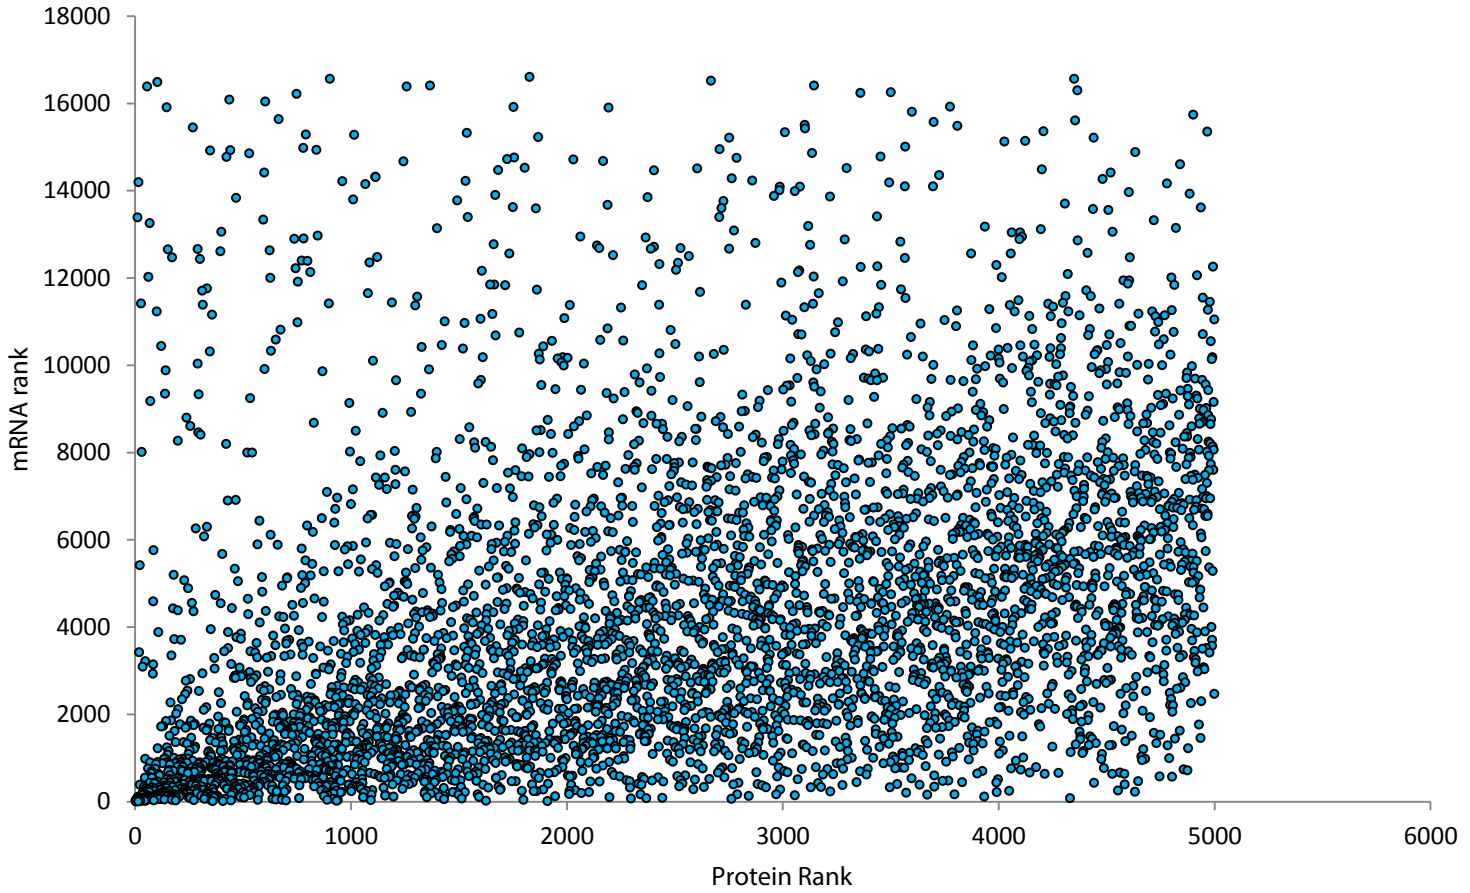

Supplementary Figure 1: Ranked mRNA abundance of genes measured in Sapio et al. plotted versus ranked protein abundance measured in this study.
